# Supplementary material for: Reactive Oxygen Species in Planarian Regeneration: An Upstream Necessity for Correct Patterning and Brain Formation
Source: Hindawi journal article supplement (doi:10.1155/2015/392476), 2015-01-01
Supplement: f1 [file 392476.f1.pdf]

# SUPPLEMENTARY DATA

## Figures

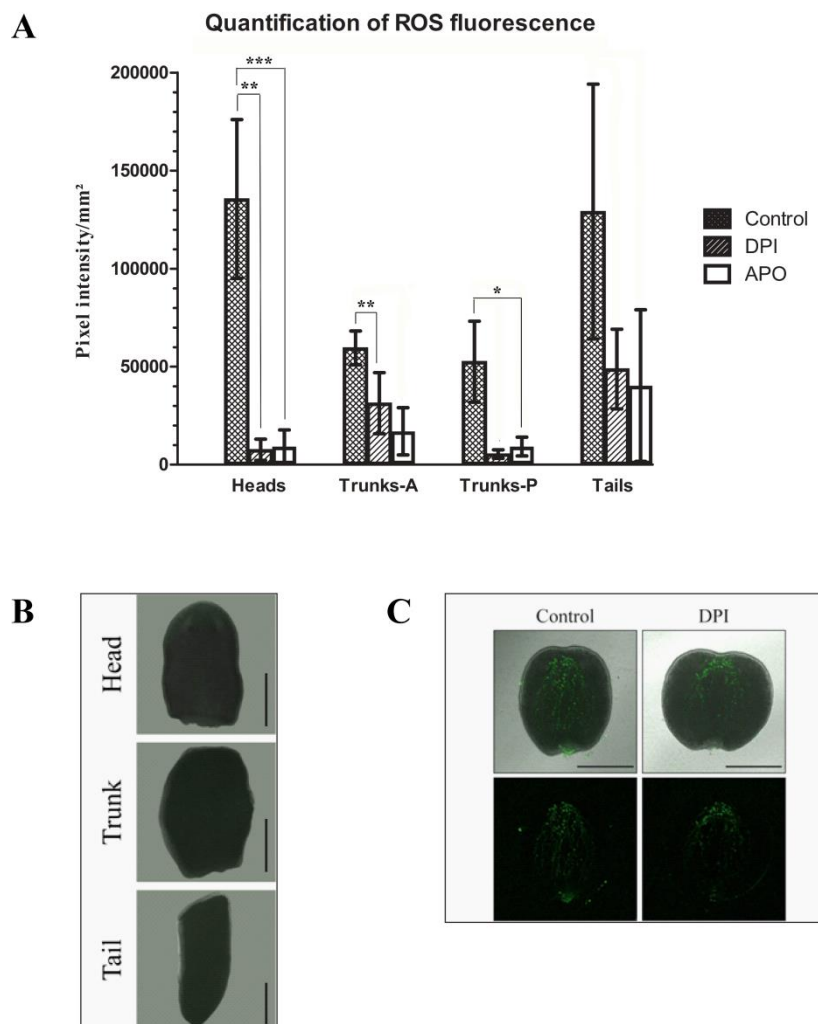

Supplementary figure 1: A) Quantification of ROS fluorescence. The average ( $\pm$  SEM) of the total pixel intensity of the wound site normalized to the total surface area of the worm is given for each wound site and each exposure condition. Statistics were performed on log-transformed data. Significant differences in ROS-induced fluorescence were observed after DPI and APO exposure in the posterior wound sites of the head fragments (control heads:  $n = 10$ ; DPI-exposed heads:  $n = 4$ ; APO-exposed heads:  $n = 2$ ). At the anterior wound site of the trunks, a significant decrease of fluorescence was observed in the DPI-exposed animals (control trunks-A:  $n = 10$ ; DPI-exposed trunks-A:  $n = 5$ ; APO-exposed trunks-A:  $n = 4$ ). At the posterior wound site of the trunks, a significant decrease of fluorescence was observed in the DPI-exposed animals (control trunks-P:  $n = 11$ ; DPI-exposed trunks-P:  $n = 4$ ; APO-exposed trunks-P:  $n = 4$ ). The differences in fluorescence were not significant in the exposed tail fragments in comparison to the controls (control tails:  $n = 8$ ; DPI-exposed tails:  $n = 6$ ; APO-exposed tails:  $n = 3$ ). \*  $p < 0.1$ ; \*\*  $p < 0.05$ ; \*\*\*  $p < 0.01$ . p-values were obtained via one-way ANOVA analyses. B) No autofluorescence was detected at the wound sites after amputation in neither head, trunk or tail fragments ( $n = 3$  for each fragment). C) Observed ROS signaling in neuronal-like structures in regenerating head fragments. Animals were exposed to 3  $\mu$ M DPI or control medium for at least one hour before the staining procedure. Scale bar A: 500  $\mu$ m.

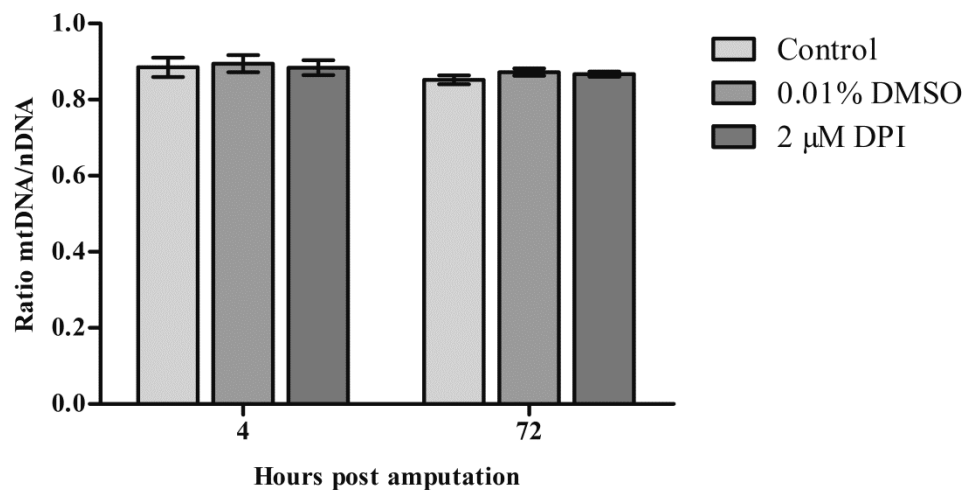

**Supplementary figure 2: Ratio mtDNA/nDNA.** Regenerating heads (4 HPA and 72 HPA) were exposed to the control medium, 0.01% DMSO or 2 μM DPI. Each bar represents the mean  $\pm$  SEM of 5 biological replicates. The effect of the treatment was analyzed via a Kruskal-Wallis test, but no significance was observed.

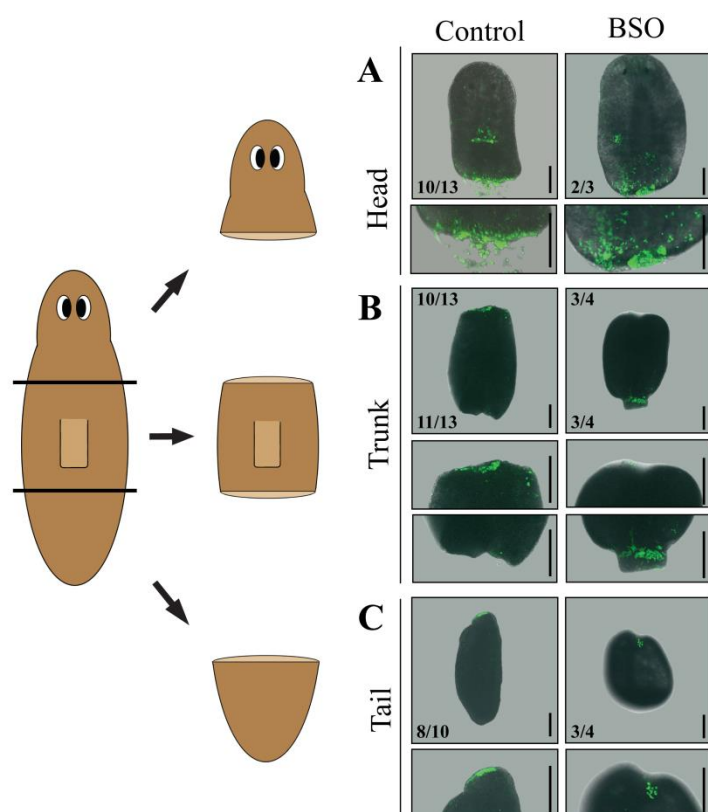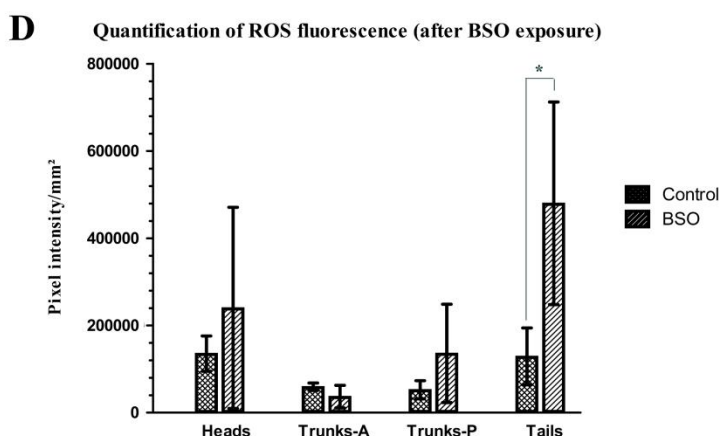

Supplementary figure 3. Visualization of ROS levels using carboxy-H<sub>2</sub>DCFDA, 30 minutes after amputation in regenerating head (A), trunk (B) and tail (C) fragments. For each condition an image of the entire animal is shown followed by close-ups of both the anterior and posterior wound sites. ROS are produced at the amputation site in control animals, but ROS levels are visibly increased in BSO-exposed organisms. All animals were exposed for at least one hour before the staining procedure. Scale bars total image: 200  $\mu$ m, scale bars close-ups: 400  $\mu$ m. D) Quantification of ROS fluorescence. The average ( $\pm$  SEM) of the total pixel intensity of the wound site normalized to the total surface area of the worm is given for each wound site and each exposure condition. An increased fluorescence is observed after BSO exposure in exposed head, trunk and tail fragments (heads: n = 2; trunks: n = 4; tails: n = 4). A significant difference in ROS-induced fluorescence were observed after BSO exposure in the anterior wound sites of the tail fragments. \* p < 0.1. p-values were obtained via one-way ANOVA analyses.

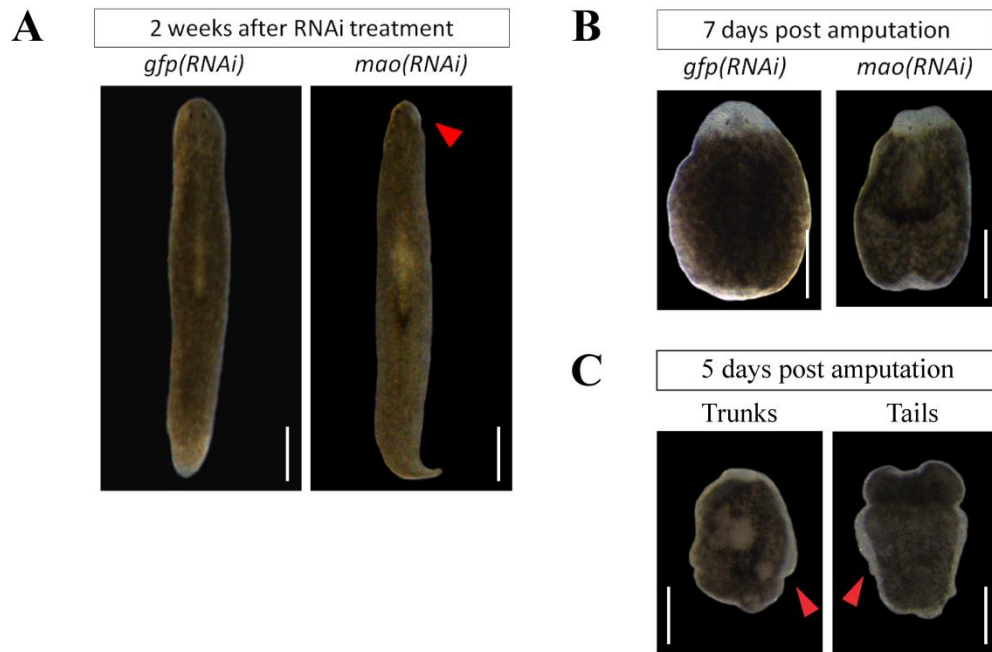

**Supplementary figure 4: The effects of *mao(RNAi)* on intact and regenerating planarians. A)** Approximately two weeks after the first injections, *mao(RNAi)* animals formed lesion in the head region, as indicated by the red arrow head (n = 5). These animals eventually lost their photoreceptors. Animals were injected for two rounds (2x3 days). Scale bar: 1 mm. **B)** *mao(RNAi)* animals were able to regenerate proper blastemas and photoreceptors (n = 4). No regeneration defaults were observed at 7 DPA. Regenerating head fragments died within 3 days post amputation. Scale bar: 500  $\mu$ m. **C)** Lesions were observed in some of the regenerating *mao(RNAi)* trunk and tail fragments at 5 DPA, as indicated by the red arrow heads. Scale bar: 500  $\mu$ m.

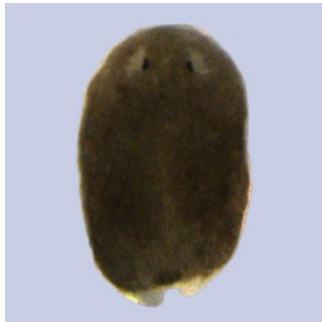

**Supplementary figure 5: A two-tail phenotype was occasionally observed in regenerating head fragments after DPI exposure, as can also be observed in figure 5.**

**Tables**

|                  | 4 HPA (2 $\mu$ M DPI) | 72 HPA (2 $\mu$ M DPI) |
|------------------|-----------------------|------------------------|
| <i>cat</i>       | 0.849 $\pm$ 0.188     | 1.163 $\pm$ 0.179      |
| <i>CuZnsod</i>   | 0.950 $\pm$ 0.248     | 1.312 $\pm$ 0.035      |
| <i>pbx</i>       | 0.775 $\pm$ 0.066     | 1.293 $\pm$ 0.113      |
| <i>sfrp-1</i>    | 0.571 $\pm$ 0.118     | 0.975 $\pm$ 0.210      |
| <i>fz-4</i>      | /                     | 0.916 $\pm$ 0.192      |
| <i>smewi-2</i>   | 0.777 $\pm$ 0.061     | 1.288 $\pm$ 0.044      |
| <i>pcna</i>      | 0.803 $\pm$ 0.246     | 0.987 $\pm$ 0.278      |
| <i>tor</i>       | 0.677 $\pm$ 0.076     | 1.204 $\pm$ 0.171      |
| <i>cdc73</i>     | 1.026 $\pm$ 0.113     | 0.938 $\pm$ 0.055      |
| <i>cyclin-B1</i> | /                     | 1.047 $\pm$ 0.183      |
| <i>jnk</i>       | 0.964 $\pm$ 0.061     | 1.297 $\pm$ 0.185      |
| <i>foxo</i>      | 0.870 $\pm$ 0.167     | 1.161 $\pm$ 0.136      |
| <i>pc2</i>       | 0.525 $\pm$ 0.035     | 1.236 $\pm$ 0.183      |
| <i>ndk</i>       | 0.513 $\pm$ 0.058     | 1.349 $\pm$ 0.157      |
| <i>bax</i>       | 1.052 $\pm$ 0.052     | 1.097 $\pm$ 0.076      |
| <i>casp3</i>     | 0.807 $\pm$ 0.124     | 1.119 $\pm$ 0.094      |
| <i>bcl2</i>      | 1.044 $\pm$ 0.337     | 1.446 $\pm$ 0.234      |

**Supplementary table 1. Transcript levels of genes of interest in response to DPI exposure in regenerating head pieces, 4 hours or 72 hours after amputation. Genes of interest include antioxidative genes (*cat*, *CuZnsod*), genes involved in patterning (*pbx*, *sfrp-1*, *fz4*), in differentiation (*smewi-2*, *ndk*), cell cycle-related genes (*pcna*, *tor*, *cdc73*, *cyclin-B1*, *jnk*), neuronal genes (*pc2*) and apoptosis-related genes (*bax*, *casp3*, *bcl2*). All transcript values are normalized and expressed relative to the control group (0.01% DMSO) during DPI exposure at 4 hours or 72 hours post amputation. The values indicated in the table are the average  $\pm$  se of minimum 4 biological replicates. Significant effects (as compared to the corresponding 0.01% DMSO-exposed control worms):  $\square$   $p < 0.1$ ;  $\blacksquare$   $p < 0.05$ . p-values were obtained via one-way ANOVA analyses.**

| <b>Experimental design</b>                    |                                                                                                                                                                                                                                                                                                                                                                                                                                                                                                                                                   |
|-----------------------------------------------|---------------------------------------------------------------------------------------------------------------------------------------------------------------------------------------------------------------------------------------------------------------------------------------------------------------------------------------------------------------------------------------------------------------------------------------------------------------------------------------------------------------------------------------------------|
| Definition of experimental and control groups | <p>Experimental groups:</p> <ul style="list-style-type: none"> <li>- Regenerating planarians (head pieces) 3 hours post amputation exposed to 2 <math>\mu</math>M DPI, dissolved in 0.01% DMSO</li> <li>- Regenerating planarians (head pieces) 72 hours post amputation exposed to 2 <math>\mu</math>M DPI, dissolved in 0.01% DMSO</li> </ul> <p>Control groups:</p> <ul style="list-style-type: none"> <li>- Regenerating planarians (head pieces) in culture medium</li> <li>- Regenerating planarians (head pieces) in 0.01% DMSO</li> </ul> |
| Number within each group                      | $n \geq 4$                                                                                                                                                                                                                                                                                                                                                                                                                                                                                                                                        |
| <b>Sample</b>                                 |                                                                                                                                                                                                                                                                                                                                                                                                                                                                                                                                                   |
| If frozen, how and how quickly?               | Snap frozen in liquid nitrogen                                                                                                                                                                                                                                                                                                                                                                                                                                                                                                                    |
| Sample storage conditions and duration        | Stored at -70 °C for one month maximally                                                                                                                                                                                                                                                                                                                                                                                                                                                                                                          |
| <b>Nucleic acid extraction</b>                |                                                                                                                                                                                                                                                                                                                                                                                                                                                                                                                                                   |
| Procedure and/or instrumentation              | Frozen animals were disrupted by chemical lysis in 200 $\mu$ l RNA lysis/binding buffer (Qiagen, Venlo, the Netherlands) including 1% $\beta$ -mercaptoethanol. RNA was isolated using a phenol-chloroform extraction procedure (14) and was precipitated with Na-acetate and 70% ethanol and resuspended in RNase-free water.                                                                                                                                                                                                                    |
| Details of DNase or RNase treatment           | Genomic DNA was removed with the Turbo DNA free kit (Ambion).                                                                                                                                                                                                                                                                                                                                                                                                                                                                                     |
| Nucleid acid quantification                   | RNA concentrations were assessed using spectrophotometry                                                                                                                                                                                                                                                                                                                                                                                                                                                                                          |
| Instrument and method                         | Nanodrop ND-1000 spectrophotometer (NanoDrop Technologies)                                                                                                                                                                                                                                                                                                                                                                                                                                                                                        |
| Purity                                        | 260/280 and 260/230 analysis                                                                                                                                                                                                                                                                                                                                                                                                                                                                                                                      |
| <b>Reverse transcription</b>                  |                                                                                                                                                                                                                                                                                                                                                                                                                                                                                                                                                   |
| Complete reaction conditions                  | SuperScript III First-Strand Synthesis SuperMix for qRT-PCR (Invitrogen)                                                                                                                                                                                                                                                                                                                                                                                                                                                                          |
| Amount of RNA and reaction volume             | 740.4 ng of total RNA in a reaction volume of 20 $\mu$ l                                                                                                                                                                                                                                                                                                                                                                                                                                                                                          |
| Storage condition of cDNA                     | cDNA was 1/10 diluted in water before storage at -20                                                                                                                                                                                                                                                                                                                                                                                                                                                                                              |

|                                           |                                                                                                                                                                                                                                                                                                                                                                                                                                                                                                                                                                                                                                                                                                                                                                                                                                                                                                                           |                                                                            |
|-------------------------------------------|---------------------------------------------------------------------------------------------------------------------------------------------------------------------------------------------------------------------------------------------------------------------------------------------------------------------------------------------------------------------------------------------------------------------------------------------------------------------------------------------------------------------------------------------------------------------------------------------------------------------------------------------------------------------------------------------------------------------------------------------------------------------------------------------------------------------------------------------------------------------------------------------------------------------------|----------------------------------------------------------------------------|
|                                           | °C                                                                                                                                                                                                                                                                                                                                                                                                                                                                                                                                                                                                                                                                                                                                                                                                                                                                                                                        |                                                                            |
| qPCR target information                   |                                                                                                                                                                                                                                                                                                                                                                                                                                                                                                                                                                                                                                                                                                                                                                                                                                                                                                                           |                                                                            |
| Gene symbol and sequence accession number | <i>cat</i> (mk4.004415.04) <sup>2</sup> ; <i>CuZnsod</i> (mk4.002589.08) <sup>2</sup> ; <i>pbx</i> (KC353351.1) <sup>1</sup> ; <i>sfrp-1</i> (EU130790.1) <sup>1</sup> ; <i>fz-4</i> (EU130789.1) <sup>1</sup> ; <i>smedwi-2</i> (DQ186986.1) <sup>1</sup> ; <i>pcna</i> (mk4.000845.01) <sup>2</sup> ; <i>tor</i> (JF894291.2) <sup>1</sup> ; <i>cdc73</i> (FJ588624.1) <sup>1</sup> ; <i>cyclin-B1</i> (FJ588606.1) <sup>1</sup> ; <i>jnk</i> (mk4.005863.01) <sup>2</sup> ; <i>foxo</i> (mk4.016444.00) <sup>2</sup> ; <i>pc2</i> (BK007043.1) <sup>1</sup> ; <i>ndk</i> (mk4.003636.00) <sup>2</sup> ; <i>bax</i> (mk4.009485.00) <sup>2</sup> ; <i>casp3</i> (mk4.003689.00) <sup>2</sup> ; <i>bcl2</i> (FJ807655.1) <sup>1</sup> ; <i>cys</i> (mk4.027397.00) <sup>2</sup> ; <i>β-act</i> (mk4.000205.04) <sup>2</sup> ; <i>gapdh</i> (mk4.002051.00) <sup>2</sup><br><br>( <sup>1</sup> NCBI, <sup>2</sup> SMEDGD) |                                                                            |
| Amplicon length                           | <i>cat</i> (113); <i>CuZnsod</i> (111); <i>pbx</i> (101); <i>sfrp-1</i> (103); <i>fz-4</i> (119); <i>smedwi-2</i> (73); <i>pcna</i> (114); <i>tor</i> (92); <i>cdc73</i> (98); <i>cyclin-B1</i> (110); <i>jnk</i> (92); <i>foxo</i> (114); <i>pc2</i> (120); <i>ndk</i> (109); <i>bax</i> (85); <i>casp3</i> (91); <i>bcl-2</i> (113); <i>cys</i> (105); <i>β-act</i> (107); <i>gapdh</i> (104)                                                                                                                                                                                                                                                                                                                                                                                                                                                                                                                           |                                                                            |
| In silico specificity screen (BLAST)      | <i>cat</i> (catalase); <i>CuZnsod</i> (superoxide dismutase copper zinc); <i>sfrp-1</i> (secreted frizzled protein-like protein); <i>fz-4</i> (frizzled receptor-like protein); <i>smedwi-2</i> (piwi-like protein 2); <i>pcna</i> (proliferating cell nuclear antigen); <i>tor</i> (target of rapamycin); <i>cdc73</i> (cell division cycle 73); <i>jnk</i> (c-jun N-terminal kinase); <i>foxo</i> (forkhead box O); <i>pc2</i> (prohormone convertase 2); <i>ndk</i> (nou-darake); <i>bax</i> (bcl-2 associated X protein); <i>casp3</i> (caspase 3); <i>bcl-2</i> (B-cell lymphoma 2); <i>cys</i> (cystatin); <i>β-act</i> (β-actin); <i>gapdh</i> (glyceraldehydes 3-phosphate dehydrogenase)                                                                                                                                                                                                                         |                                                                            |
| Location of each primer by exon or intron | Intron spanning primers: <i>cat</i> , <i>CuZnsod</i> , <i>foxo</i> , <i>bax</i> , <i>cys</i>                                                                                                                                                                                                                                                                                                                                                                                                                                                                                                                                                                                                                                                                                                                                                                                                                              |                                                                            |
| qPCR oligonucleotides                     |                                                                                                                                                                                                                                                                                                                                                                                                                                                                                                                                                                                                                                                                                                                                                                                                                                                                                                                           |                                                                            |
| Primer sequences                          | <i>cat</i>                                                                                                                                                                                                                                                                                                                                                                                                                                                                                                                                                                                                                                                                                                                                                                                                                                                                                                                | 5'- CCATTTAGAAATTACGAAGTCGATG-3' (F)<br>5'- AAGTATCTTGGGTTATGTTGAGG-3' (R) |
|                                           | <i>CuZnsod</i>                                                                                                                                                                                                                                                                                                                                                                                                                                                                                                                                                                                                                                                                                                                                                                                                                                                                                                            | 5'- TTCATGCTGTATGCGTTTTG-3' (F)<br>5'-AACCGTGTTTACCAGGAGTTAGA -3' (R)      |

|                                             |                                                            |                                                                         |
|---------------------------------------------|------------------------------------------------------------|-------------------------------------------------------------------------|
|                                             | <i>pbx</i>                                                 | 5'-GAGTTATGGCGGTCATTCTG -3' (F)<br>5'-CTGGTTCGTCTTCTCTCATGC -3' (R)     |
|                                             | <i>sfrp-1</i>                                              | 5'-CGCTCTGGGGTTGAATCTG -3' (F)<br>5'-GTTGTCGCTGTCGATTTGTG -3' (R)       |
|                                             | <i>fz-4</i>                                                | 5'-CGAGGAAAAATCTGCCTGAC -3' (F)<br>5'-CCTTGCATAACGAGCTGGAG -3' (R)      |
|                                             | <i>smedwi-2</i>                                            | 5'-GTCATCGTAAAGAAAAGAGTCGGC -3' (F)<br>5'-CCACAACAGTTCAGGATTTGG -3' (R) |
|                                             | <i>pcna</i>                                                | 5'-TCTTCTCAAGTATCTCTGTCGTTG -3' (F)<br>5'-CTCGTCGTCTTCGATTTTAGG -3' (R) |
|                                             | <i>tor</i>                                                 | 5'-GGATTTGTCCAGTCGCATTC -3' (F)<br>5'-CCATCGGGTTGACTCTTAGC -3' (R)      |
|                                             | <i>cdc73</i>                                               | 5'-GGAACATATCACGGCAAAGG -3' (F)<br>5'-GGTGCGGGTTGTCTGTTAG -3' (R)       |
|                                             | <i>cyclin-B1</i>                                           | 5'-GGTTTCCTACGCGAAAACAG -3' (F)<br>5'-CCGACCAATAGGATCAATGG -3' (R)      |
|                                             | <i>jnk</i>                                                 | 5'-GTTTCCCGGTACAGATCACA-3' (F)<br>5'-ATGGCTGTAAACGGCTAAGAA-3' (R)       |
|                                             | <i>foxo</i>                                                | 5'-CATGAAAAGCTCGTTGTGG-3' (F)<br>5'-TTAGCAATTTGCGTCTGG-3' (R)           |
|                                             | <i>pc2</i>                                                 | 5'-ATGACCCTTACCCGTTCC -3' (F)<br>5'-CGTATGCCACTCCAAC-3' (R)             |
|                                             | <i>ndk</i>                                                 | 5'-ATTCGGCTCAAGAGAAGTGG-3' (F)<br>5'-GAAACACGGAGGTTTCATATTAG-3' (R)     |
|                                             | <i>bax</i>                                                 | 5'-CAAGTCGGCTTTAATGATTCTC -3' (F)<br>5'-AAACAGGTATACGATTGCGTTCCA-3' (R) |
|                                             | <i>casp3</i>                                               | 5'-ATTCAAGCCTGTCGTGGTG-3' (F)<br>5'-CAGCTCAATTGGAATCTTTCT-3' (R)        |
|                                             | <i>bcl-2</i>                                               | 5'-GGGTCAGAGAAAATGGAGGA -3' (F)<br>5'-TATCCCCAGGGCCACTTT-3' (R)         |
|                                             | <i>cys</i>                                                 | 5'-AACTCCATGGCTAGAACCGAA -3' (F)<br>5'-CCGTCGGGTAATCCAAGTACA-3' (R)     |
|                                             | <i><math>\beta</math>-act</i>                              | 5'-AGAACAGCTTCAGCCTCGTCA-3' (F)<br>5'-TGGAATAGTGCTTCTGGGCAT-3' (R)      |
|                                             | <i>gapd</i>                                                | 5'-GCAAAACATTATTCCGGCTTC-3' (F)<br>5'-GCACTGGAACCTCTAAAGGCCA-3' (R)     |
| <b>qPCR protocol</b>                        |                                                            |                                                                         |
| Complete reaction conditions                | SYBR Green Master Mix (Applied Biosystems)                 |                                                                         |
| Reaction volume and amount of cDNA/DNA      | Reaction volume: 10 $\mu$ l<br>Amount of cDNA: 2.5 $\mu$ l |                                                                         |
| Primer                                      | Primer: 0.3 mM of forward and reverse primer               |                                                                         |
| Polymerase, Mg <sup>2+</sup> , dNTP, buffer | Included in the SYBR Green Master Mix (Applied Biosystems) |                                                                         |



|                                                       |                                                                                                   |
|-------------------------------------------------------|---------------------------------------------------------------------------------------------------|
| Complete thermocycling parameters                     | Universal cycling conditions:<br>10 min at 95 °C<br>40 cycles: 15 s at 95 °C and 60 s at 60 °C    |
| Manufacturer of qPCR instrument                       | ABI PRISM 7900 (Applied Biosystems)                                                               |
| <b>qPCR validation</b>                                |                                                                                                   |
| Specificity (gel, sequence, melt or digest)           | Samples with a melt temperature ( $T_m$ ) deviating from the product specific $T_m$ were excluded |
| For SYBR Green I, $C_q$ of the NTC                    | NTC of qPCR reaction gave no amplification                                                        |
| PCR efficiency                                        | 0.85-1.15                                                                                         |
| $R^2$ of calibration curve                            | $\geq 99\%$                                                                                       |
| <b>Data analysis</b>                                  |                                                                                                   |
| qPCR analysis program (source, version)               | qBase (Biogazelle)                                                                                |
| Method of $C_q$ determination                         | SDS software version 2.3 (Applied Biosystems)                                                     |
| Results for NTCs                                      | NTC of qPCR reaction gave no amplification                                                        |
| Justification of number and choice of reference genes | geNorm and Normfinder analyses                                                                    |
| Description of normalization method                   | $2^{-\Delta\Delta C_t}$ (33)                                                                      |
| Statistical methods for results significance          | Kruskal-Wallis                                                                                    |
| Software (source, version)                            | R 3.0.2                                                                                           |

**Supplementary table 2: MIQE guidelines concerning qPCR experiment (9).**
